# Supplementary material for: Science to the rescue or contingent progress? Comparing 10 years of public, expert and policy discourses on new and emerging science and technology in the United Kingdom
Source: PubMed Central journal article supplement (PMC6055116; doi:10.1177/0963662517706452), 2017-05-11
Supplement: online_appendix_14_feb_17.pdf [file online_appendix_14_feb_17.pdf]

# Online Appendix

## 1. Documents included in the computer assisted text analysis

### Corpus A: Public dialogue reports

**Animals Containing Human Material (2010):** Led by the Academy of Medical Sciences, this public dialogue formed part of a broader study on the scientific, social, ethical, safety and regulatory aspects of research involving non-human embryos and animals containing human material.

**DrugsFutures (2006-2008):** DrugsFutures was commissioned as part of the Academy of Medical Science's independent review of the societal, health, safety and environmental issues raised by scientific advances in brain science, addiction and drugs (BSAD).

**Forensic Use of DNA (2007-2008):** This project aimed to find out people's views on the forensic use of DNA, particularly in relation to the information held on the National DNA Database (NDNAD). Sponsored by the Human Genetics Commission (HGC).

**Geoengineering (2010):** The Natural Environment Research Council (NERC), in partnership with Sciencewise-ERC carried out this public dialogue to explore the views of the public in relation to geoengineering. In particular the moral, social and ethical implications of future research on geoengineering were assessed.

**GM Foods (2002)\*:** This report presents The Food Standards Agency's contribution to the UK government's dialogue on GM foods, based on a citizen's jury. The dialogue set out to independently assess people's views, especially those whose voices are not often heard, on the acceptability of GM food and how this relates to consumer choice.

**Hybrids and Chimeras (2006):** This project was part of the Human Fertilisation and Embryology Authority's (HFEA) public and stakeholder consultation on hybrids and chimera embryos. This was carried out to guide the Authority's recommendations to Government on whether this type of research should be allowed in the future.

**Nanodialogues (2005-2007):** Nanodialogues was developed as a result of recommendations by the Royal Society and the Royal Academy of Engineering on how the Government should take forward the new and challenging area of nanotechnology research.

**Nanojury (2003)\*:** The NanoJury brought together 20 randomly-chosen people from different backgrounds who will hear evidence about the role that nanotechnologies might play in their future.

**Nanotechnology for healthcare (2008)\*:** Sponsored by the Engineering and Physical Sciences Research Council, this dialogue set out to take account of a wide set of societal views and inform nanotechnology research trajectories for healthcare

**Public perceptions of industrial biotechnology (2006):** IB is the application of bioscience (including genetically modified organisms) for the processing and production of chemicals, materials and energy. The aim of the project, sponsored by the Department for Business, Enterprise & Regulatory Reform (BERR), was to assess and understand the public perception and values around IB.

**ScienceHorizons (2006-2007):** Sciencehorizons was the public-facing part of a stakeholder consultation on the Wider Implications of Science and Technology (WIST) carried out by the Government Office for Science's Horizon Scanning Centre. Its aim was to explore the public's views on future applications of science and technology that emerged from two Horizon Scans which involved scientists and experts thinking about future science and technology.

**SmallTalk (2005)\*:** SmallTalk was a series of public dialogue activities that explored the aspirations and concerns of the public and scientists around nanotechnologies.

**Stem Cell dialogue (2007-2008):** This project developed public dialogue activities around the science and social and ethical issues of stem cell research, with the aim of providing an understanding of views and concerns among diverse groups, including scientists, which could then feed into policy makers' strategic decision making.

**Synthetic Biology (2009-2010):** The Synthetic Biology Dialogue has been commissioned by BBSRC (Biotechnology and Biological Sciences Research Council) and EPSRC (Engineering and Physical Sciences Research Council), on behalf of RCUK, and will explore the public's views, concerns and aspirations around synthetic biology.

**Synthetic Biology, Royal Academy of Engineering (2008)\*:** This report presents the findings of an exploratory public dialogue project, commissioned by the Royal Academy of Engineering (the Academy) and conducted by People Science and Policy Ltd (PSP) to explore uninformed and informed perceptions of and attitudes to synthetic biology in the UK.

**The Big Energy Shift (2008-2009):** The Big Energy Shift aimed to encourage people to discuss the way they insulate, heat and power their homes and communities. It took place in parallel with the formal consultations on the Heat and Energy Saving Strategy and Renewable Energy Strategy.

## **Corpus B: Expert reports**

**Animals Containing Human Materials (2011) Academy of Medical Sciences:** The broader study on the scientific, social, ethical, safety and regulatory aspects of research involving non-human embryos and animals containing human material, into which the public dialogue fed.

**Brain Science (2008) Academy of Medical Sciences:** Report produced by a working group chaired by Prof Sir Gabriel Horn, to consider societal, health, safety and environmental issues raised by scientific advances in brain science, addiction and drugs (BSAD).

**Geoengineering the climate: science, governance and uncertainty**

**GM Science Review First Report (2003) The GM Science Review Panel.** An open review of the science relevant to GM crops and food based on interests and concerns of the public

**Human Animal Hybrids (2007) HFEA:** Final report of the HFEA review of human animal hybrids, which the public dialogue feeds into.

**IB 2025 – Maximising UK Opportunities from Industrial Biotechnology in a Low Carbon Economy (May 2009).** A report to Government by the industrial biotechnology innovation and growth team, which included members from academia and industry.

**Nanodialogues reponse (2007):** BBSRC and EPSRC joint response to the nanodialogues: engaging research councils

**Nanosciences and nanotechnologies: Opportunities and Uncertainties (2004)** Royal Society & Royal Academy of Engineering report looking at future of nanoscience. Included input from a public dialogue activity.

**Nothing to Hide, Nothing to Fear: Balancing individual human rights and the public interest in governance of the National DNA Database (2009) Human Genetics Commission.** Report which 'forensic use of DNA' dialogue fed into. Project

**Royal Society (2009).** Report into potential of geoengineering, which included element of public consultation.

**Stem Cell Infrastructure Report (2008) The Medical Research Council (MRC).** Considers the research landscape and national needs, to determine infrastructure support for the sector.

**Synthetic Biology - scope, applications and implications (2009) Royal Academy of Engineering :** Identifies the next steps to build on the UK's position in the field, create a regulatory framework and to explore, with the public, the ethical and societal issues involved. Includes outputs of the 2008 public dialogue.

**Synthetic Biology Roadmap (2012)** Produced by the UK Synthetic Biology Roadmap Coordination Group, which included a wide range of stakeholders, including academics, industrialists and, on behalf of the Research Councils, the Biotechnology and Biological Sciences Research Council (BBSRC), Engineering and Physical Sciences Research Council (EPSRC) and the Technology Strategy Board (TSB).

## **Corpus C: Policy reports**

Genetically Modified Foods – Frequently Asked Questions (Defra 2004)

Government Response to the House of Commons, Science and Technology Committee 5th Report of Session 2009-10: The Regulation of Geoengineering

Government Response to the House of Lords Science and Technology Committee Inquiry into Regenerative Medicine (2013)

Government response to the Industrial Biotechnology – Innovation & Growth team report to Government (2009)

Government Response to the Report from the Joint Committee on the Human Tissue and Embryos (Draft) Bill (2007)

Government response to the UK Stem Cell Initiative report and recommendations (2007)

House of Commons Science and Technology Committee: Government proposals for the regulation of hybrid and chimera embryos. Fifth Report of Session 2006–07.

The GM Dialogue – Government Response (2004)

UK Government response to ‘A Synthetic Biology Road Map for the UK’ (Letter from Science Minister, 2012)

UK Government Response to The Royal Commission on Environmental Pollution (RCEP) Report “Novel Materials in the Environment: The Case Of Nanotechnology” (2009)

UK Government response to the Royal Society and Royal Academy of Engineering Report ‘Nanoscience and nanotechnologies: opportunities and uncertainties’ (2005)

## 2. 50 most significant words for each class produced by IRAMUTEQ analysis of public dialogue documents

Number of texts: 18

Number of text segments: 5592

Number of words: 9062

Number of occurrences: 205499

Average number of occurrences for each word: 22.677003

Number of lemmas: 6602

Number of active words: 6055

Number of supplementary words: 547

Number of classes 5

3999 segments classified of 5592 (71.51%)

| Class A1<br>15.68% | Class A2<br>25.48% | Class A3 23.38% | Class A4<br>17.65% | Class A5<br>17.80% |
|--------------------|--------------------|-----------------|--------------------|--------------------|
| drug               | application        | climate         | industrial         | animal             |
| young              | area               | geoengineering  | biotechnology      | human              |
| recreational       | treatment          | change          | gm                 | material           |
| outreach           | biology            | public          | food               | embryo             |
| user               | potential          | event           | crop               | research           |
| person             | science            | mitigation      | environment        | create             |
| belfast            | synthetic          | dialogue        | product            | hybrid             |
| illicit            | disease            | decision        | consumer           | egg                |
| child              | fund               | talk            | release            | agree              |
| parent             | nanotechnology     | member          | fuel               | welfare            |
| education          | therapy            | activity        | biofuels           | respondent         |
| addiction          | field              | scientist       | natural            | cytoplasmic        |
| alcohol            | private            | report          | bacterium          | cell               |
| harm               | medical            | information     | land               | disagree           |
| enhancers          | investment         | engagement      | eat                | creation           |
| family             | patient            | expert          | stage              | man                |
| cognition          | stem               | scientific      | impact             | survey             |
| school             | device             | policymakers    | gmos               | figure             |
| legal              | clinical           | trust           | production         | tissue             |
| crime              | female             | recommendation  | enzyme             | compare            |
| heroin             | significant        | policy          | concern            | percent            |
| workshop           | control            | explain         | chemical           | acceptable         |
| teacher            | council            | panel           | process            | statement          |
| exeter             | cell               | government      | organism           | brain              |
| service            | development        | principle       | unite              | purpose            |
| addict             | innovation         | opinion         | oil                | woman              |
| cannabis           | healthcare         | engage          | country            | type               |
| class              | male               | ask             | unknown            | ivf                |
| vulnerable         | vision             | deployment      | kingdom            | suffer             |
| cocaine            | sector             | issue           | plant              | consultation       |
| nicotine           | culture            | technology      | feedstocks         | donate             |

|                |                  |              |               |               |
|----------------|------------------|--------------|---------------|---------------|
| age            | commercial       | session      | fossil        | genetic       |
| liverpool      | governance       | communicate  | farmer        | experiment    |
| glasgow        | highlight        | warm         | produce       | contain       |
| addictive      | profit           | datum        | barrier       | nationally    |
| classification | advance          | discussion   | environmental | reproductive  |
| peer           | stakeholder      | science      | producer      | specie        |
| project        | instance         | robotics     | shelf         | foetal        |
| criminal       | regulator        | comment      | labelling     | half          |
| prison         | govern           | organisation | reassurance   | write         |
| vulnerability  | progress         | shift        | aid           | amount        |
| relay          | cancer           | independent  | contamination | cow           |
| feel           | hope             | jury         | industry      | cord          |
| smoke          | risk             | maker        | price         | acceptability |
| substance      | think            | interest     | traditional   | difference    |
| adhd           | drive            | attitude     | manchester    | organ         |
| commit         | nanotechnologies | evidence     | bio           | q1            |
| kid            | aspiration       | credit       | ecosystem     | mitochondrion |
| line           | technology       | scale        | landscape     | somatic       |
| drink          | regard           | clear        | bioplastics   | possibility   |

### 3. 50 most significant words for each class produced by IRAMUTEQ analysis of expert documents.

Number of texts: 12

Number of text segments: 14335

Number of words: 17791

Number of occurrences: 520547

Average number of occurrences of each word: 29.259007

Number of lemmas: 13889

Number of active words: 12876

Number of supplementary words: 1013

Number of classes: 5

9305 segments classified out of 14335 (64.91%)

| Class B1 (17.16%) | Class B2 (20.44%) | Class B3 (24.69%) | Class B4 (17.61%) | Class B5 (20.1%) |
|-------------------|-------------------|-------------------|-------------------|------------------|
| public            | crop              | drug              | cell              | chemical         |
| issue             | gm                | substance         | human             | nanoparticles    |
| nanotechnologies  | plant             | mental            | embryo            | manufacture      |
| ethical           | herbicide         | misuse            | stem              | nanotubes        |
| dialogue          | gene              | treatment         | animal            | device           |
| science           | flow              | cognition         | mouse             | industry         |
| geoengineering    | breed             | person            | tissue            | production       |
| scientific        | resistance        | harm              | hybrid            | ib               |
| debate            | food              | child             | create            | particle         |
| concern           | variety           | disorder          | embryonic         | synthetic        |
| research          | seed              | enhancers         | es                | property         |
| governance        | ht                | addiction         | line              | product          |
| stakeholder       | kingdom           | participant       | cytoplasmic       | surface          |
| workshop          | unite             | alcohol           | egg               | size             |
| consultation      | wild              | brain             | donor             | material         |
| society           | weed              | young             | somatic           | bio              |
| technology        | conventional      | cognitive         | nuclear           | market           |
| raise             | pest              | psychoactive      | mitochondrial     | industrial       |
| uncertainty       | wee               | illness           | oocyte            | base             |
| report            | bt                | recreational      | chim              | nanoscale        |
| group             | rape              | al                | creation          | biology          |
| question          | biodiversity      | user              | mitochondrion     | process          |
| policy            | insect            | abuse             | derive            | large            |
| work              | oilseed           | family            | mtdna             | chemistry        |
| attitude          | impact            | individual        | scnt              | biological       |
| council           | farm              | cocaine           | research          | sector           |
| royal             | relative          | health            | transplant        | price            |
| social            | tolerant          | illicit           | reprogram         | exposure         |
| interest          | toxin             | age               | germ              | energy           |
| panel             | pollen            | heroin            | genome            | computer         |

|               |              |                  |               |             |
|---------------|--------------|------------------|---------------|-------------|
| deliberative  | maize        | cannabis         | pluripotent   | measurement |
| commission    | trait        | school           | vitro         | company     |
| review        | grow         | receptor         | blastocyst    | application |
| societal      | field        | smoke            | ras           | feedstocks  |
| future        | resistant    | healthy          | nucleus       | engineer    |
| decision      | farmer       | depression       | immune        | molecule    |
| international | agricultural | prevalence       | hesc          | chip        |
| meet          | potato       | psychological    | ips           | cosmetic    |
| member        | fee          | intervention     | cord          | fuel        |
| technological | habitat      | death            | blood         | renewable   |
| inform        | soil         | behavioural      | sperm         | waste       |
| address       | agriculture  | schizophrenia    | transfer      | scenario    |
| discussion    | feed         | social           | clone         | carbon      |
| highlight     | glyphosate   | nicotine         | stage         | uk          |
| scientist     | bird         | risk             | interspecies  | technology  |
| acceptability | pollination  | illegal          | type          | optical     |
| expert        | specie       | survey           | derivation    | synthesis   |
| academy       | tolerance    | adhd             | therapy       | atom        |
| independent   | beet         | dependence       | chimera       | mass        |
| forward       | invasive     | effect           | bone          | design      |
| citizen       | farmland     | neurotransmitter | differentiate | nanometre   |



#### 4. 50 most significant words for each class produced by IRAMUTEQ analysis of policy documents.

Number of texts: 11

Number of text segments: 2589

Number of words: 5909

Number of occurrences: 94673

Average number of occurrences for each word: 16.021831

Number of lemmas: 4470

Number of active words: 3785

Number of supplementary words: 685

Number of classes: 4

1561 segments classified out of 2589 (60.29%)

| Class C1 (16.72%) | Class C2 (29.15%) | Class C3 (29.08%) | Class C4 (25.05%) |
|-------------------|-------------------|-------------------|-------------------|
| gm                | embryo            | commission        | ib                |
| crop              | human             | nanotechnologies  | innovation        |
| herbicide         | hybrid            | information       | council           |
| conventional      | chimera           | member            | fund              |
| grow              | animal            | royal             | igt               |
| gene              | creation          | public            | sector            |
| maize             | hfea              | section           | business          |
| plant             | act               | society           | pound             |
| farmer            | draft             | system            | industry          |
| acre              | cytoplasmic       | regulatory        | bbsrc             |
| farm              | bill              | dialogue          | strategy          |
| food              | legislation       | operation         | board             |
| cultivation       | hfe               | paragraph         | department        |
| benefit           | law               | share             | leadership        |
| generation        | licence           | confidence        | forum             |
| resistant         | purpose           | government        | skill             |
| tolerant          | prohibit          | approach          | epsrc             |
| person            | fertilisation     | inform            | lead              |
| soil              | allow             | effort            | synthetic         |
| conclude          | research          | european          | programme         |
| evaluation        | fall              | medicine          | biology           |
| risk              | embryology        | website           | support           |
| wildlife          | remit             | safety            | technology        |
| rape              | parliament        | early             | initiative        |
| oilseed           | proposal          | ensure            | energy            |
| effect            | woman             | understand        | market            |
| country           | tell              | view              | product           |
| cost              | create            | way               | strategic         |
| narrow            | permit            | price             | sustainable       |

|              |              |                |             |
|--------------|--------------|----------------|-------------|
| variety      | white        | saving         | investment  |
| commercial   | license      | hospital       | project     |
| agriculture  | regulation   | enhance        | engineer    |
| pest         | day          | stage          | industrial  |
| fses         | propose      | nanotechnology | centre      |
| offer        | inter        | response       | chemical    |
| unit         | implantation | international  | capability  |
| organic      | viability    | therapy        | work        |
| biodiversity | revise       | maker          | new         |
| farmland     | mix          | work           | facility    |
| fse          | legal        |                | bio         |
| ecology      | inquiry      |                | rural       |
| deep         | regulate     |                | change      |
| study        | committee    |                | affair      |
| result       | authority    |                | uk          |
| suggest      | regard       |                | opportunity |
| scale        | gamete       |                | procurement |
| resistance   | power        |                | academic    |
